# Supplementary material for: Nontuberculous mycobacterium M. avium infection predisposes aged mice to cardiac abnormalities and inflammation
Source: PubMed Central journal article supplement (PMC6516181; doi:10.1111/acel.12926), 2019-03-04
Supplement: ACEL-18-e12926-s001.pdf [file ACEL-18-e12926-s001.pdf]

**Supplemental Figure 1: *M. avium* infection enhances the serum cytokine levels in old mice.**

The serum of uninfected and *M. avium* ( $1.2 \times 10^5$  CFU) infected young and old mice were analyzed for levels of pro-inflammatory cytokines IL-1 $\beta$  (A) and TNF $\alpha$  (B) via ELISA (mean  $\pm$  SEM ; \*\*\* $p < 0.0005$ ; N=5)

**Supplemental Figure 2: *M. avium* infection causes premature atrial contractions in old mice.**

The RR intervals (A & C) and heart rate (B & D) was determined from 10 minutes of recorded ECG from sham and *M. avium* infected young and old mice (N=4) by using Lab Chart 8 pro software (AD Instrument). In aged mice, *M. avium* infection shows variable RR intervals and heart rate, and decreased depolarization. Graph shown is a representative of 5 mice (N=2).

**Supplemental Figure 3: Echo cartographic analysis of young and old mice.**

To assess heart function *in vivo*, 2D-echocardiography (Vevo 2100, Visualsonics) was performed in uninfected young and old mice. Representative baseline M-mode echocardiographs from young (A) and old (B) (N=5). (C) At least two M-mode echocardiogram measurements from each mouse were used to determine the LVID<sub>d</sub>, left ventricular end-diastolic dimension; LVIDs, left ventricular end-systolic dimension, ejection fraction (EF%), fractional shortening (FS%), IVST<sub>d</sub>, interventricular septal thickness in diastole; IVSTs, interventricular septal thickness in systole; LVPW<sub>d</sub>, posterior wall thickness in diastole; LVPWs, posterior wall thickness in systole.

**Supplemental Figure 4: *M. avium* infection enhances the infiltration of immune cells in to heart tissue of old mice.**

Four chamber view sections from uninfected (A&C) and *M. avium* - infected (B & D) young and old mice were stained with CD45 antibody which indicates the infiltration of leukocytes in the heart. Photomicrographs of sham treated (A&C) and *M. avium* infected (B&D) septa region were shown with 10x and 40x magnifications. The graph shows the number of CD45 cells /100 $\mu\text{m}^2$  of heart tissue from sham treated or *M. avium* infected young (E)

or old mice (F). Graph shown in (G) is comparison of CD45 positive cells in young and old mice infected with *M. avium*. The CD45 cells were counted from 10 randomly selected images from heart sections. Data shown in graphs are cumulative data from 5 animals, (mean  $\pm$  SEM; \*\*  $p < 0.005$ ).

**Supplemental Figure 5: *M. avium* infection enhances the cardiac fibrosis in old mice.** Cross sections of hearts from *M. avium* -infected young and old mice were stained with Masson's Trichrome to identify fibrosis in cardiac tissue. Image shown here are representative of cross section whole heart young (A) and old (B) mice that were infected with *M. avium*. The image shown in right panel is 20x magnification and representative of 5 animals/group. The Trichrome staining (blue color) in the heart sections was isolated using Photoshop CC in color range selection mode. The total intensity of the stained area in the heart sections was further quantified via ImageJ using color intensity to multiply area with staining. Graph shown in (C) young and old mice infected with *M. avium*. Data shown in graphs are cumulative data from 5 animals, (\*  $p < 0.005$ ) (N=5). (D) The left ventricular wall thickness in the heart sections were measured using the Aperio Image scope software. (\*  $p < 0.005$ ) (N=5). (E) The cardiac cross sectional area of *M. avium* infected young and old mice was measured using Aperio Image scope software under 0.5x magnification (mean  $\pm$  SEM; \*\*  $p < 0.005$ ; N=5)

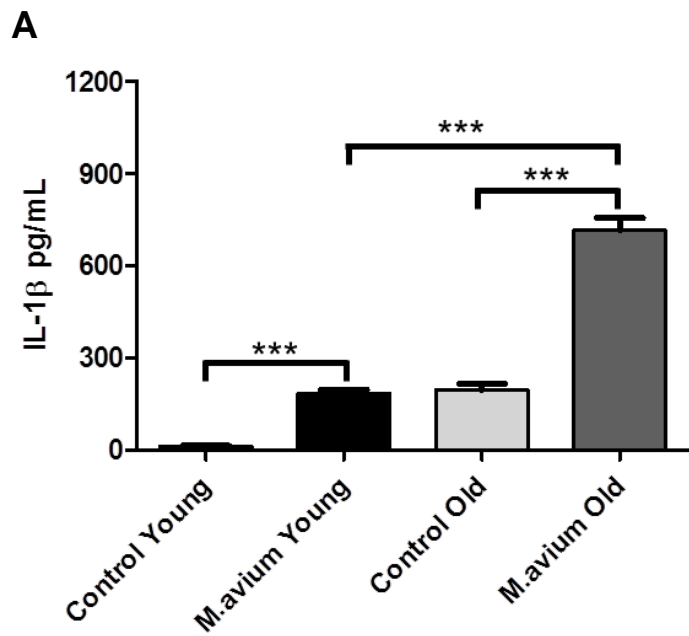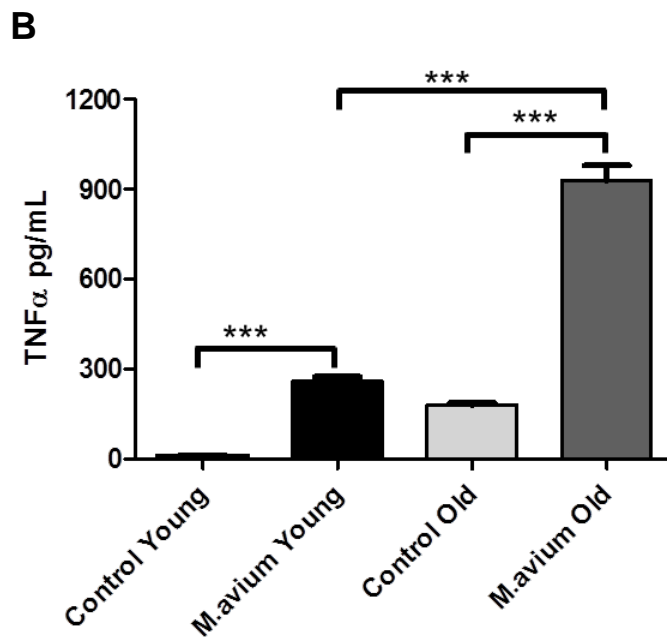

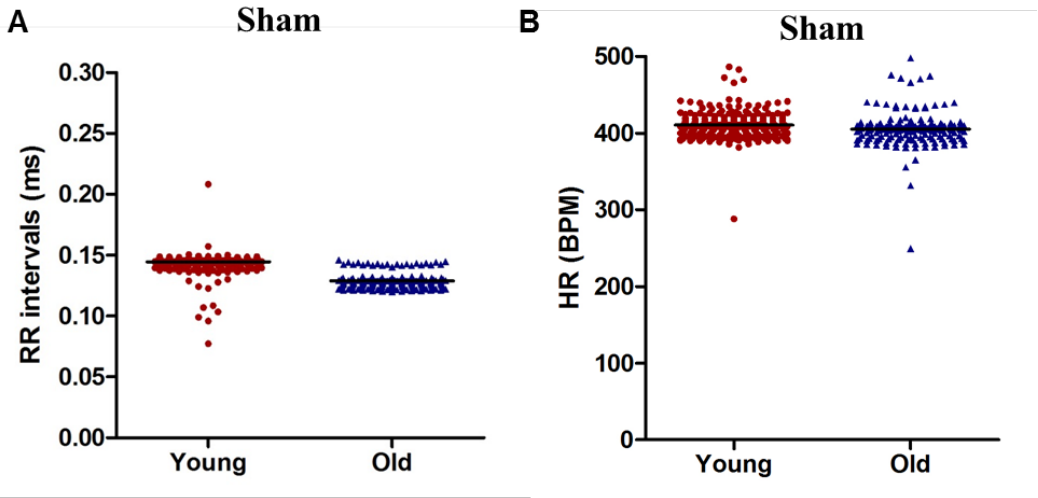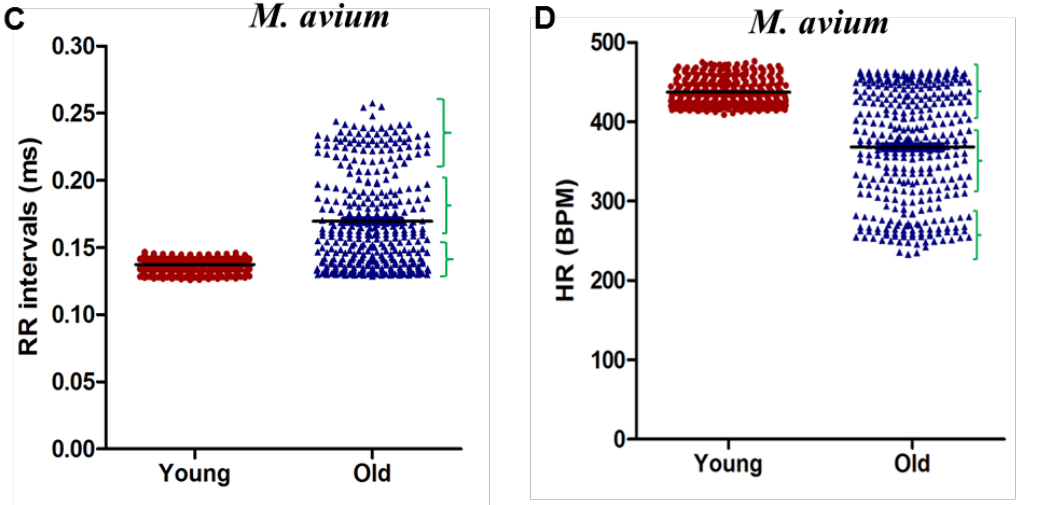

A

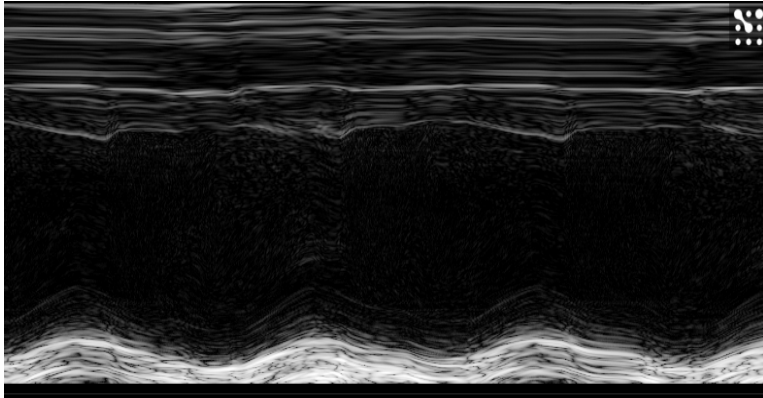

B

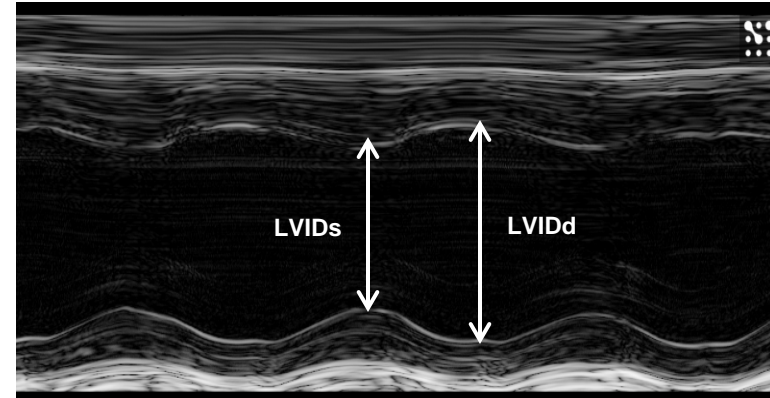

C

| Parameter | Young             | Old                    |
|-----------|-------------------|------------------------|
| LVID;d    | $3.98 \pm 0.079$  | $3.941 \pm 0.130^{ns}$ |
| LVID;s    | $2.71 \pm 0.093$  | $2.73 \pm 0.064^{ns}$  |
| EF        | $60.65 \pm 1.78$  | $58.35 \pm 2.17^{ns}$  |
| FS%       | $32.01 \pm 1.23$  | $30.45 \pm 1.55^{ns}$  |
| IVS;d     | $0.77 \pm 0.083$  | $0.85 \pm 0.049^{ns}$  |
| IVS;s     | $1.24 \pm 0.080$  | $1.25 \pm 0.053^{ns}$  |
| LVPW;d    | $0.537 \pm 0.043$ | $0.61 \pm 0.0193^{ns}$ |
| LVPW;s    | $0.88 \pm 0.073$  | $0.96 \pm 0.023^{ns}$  |

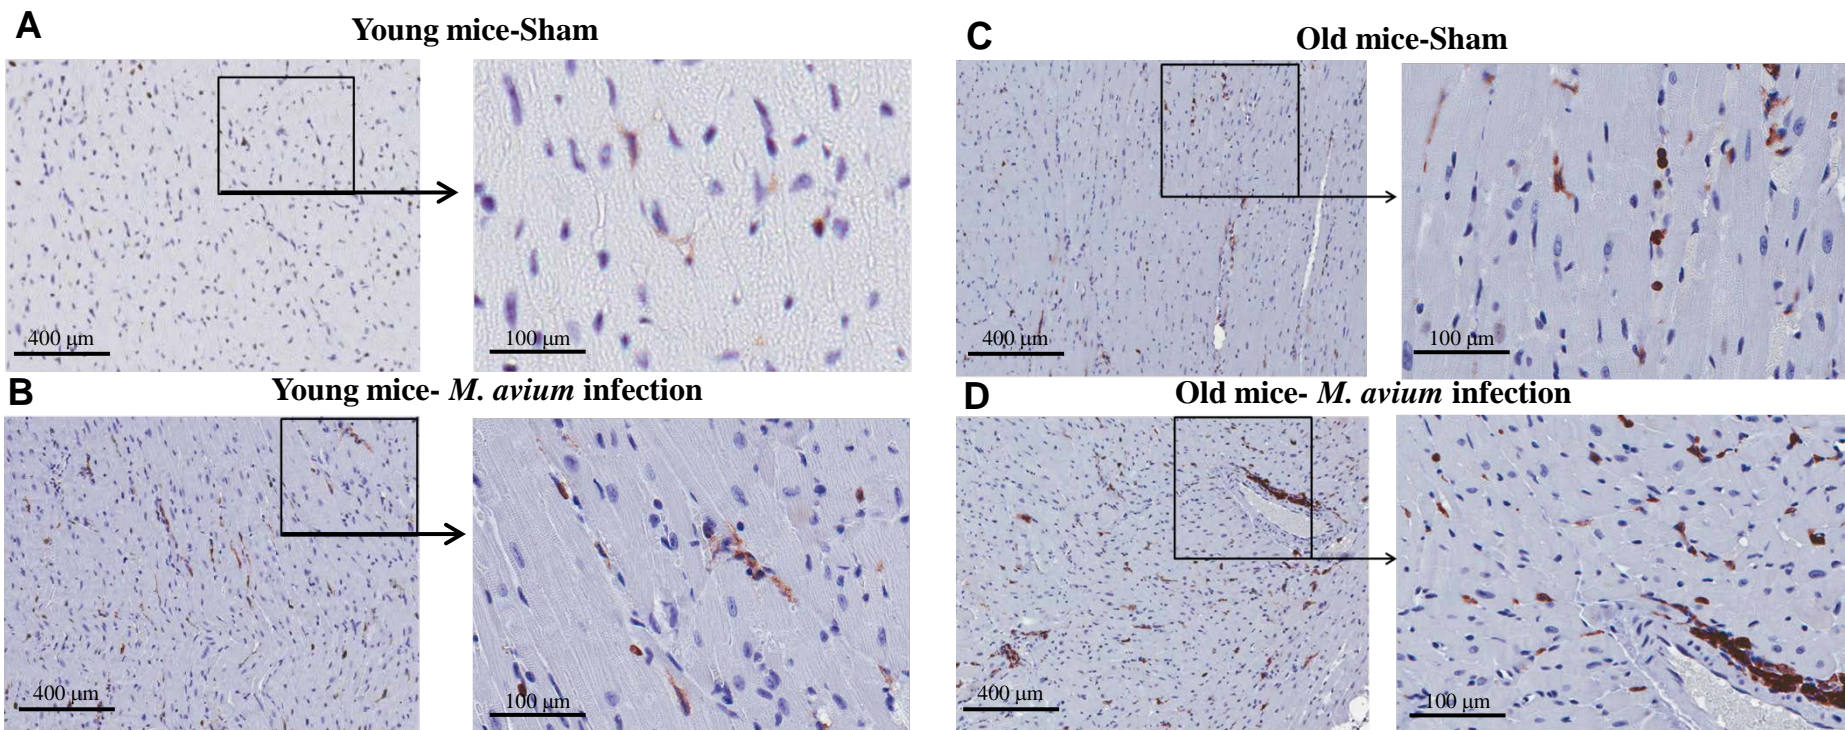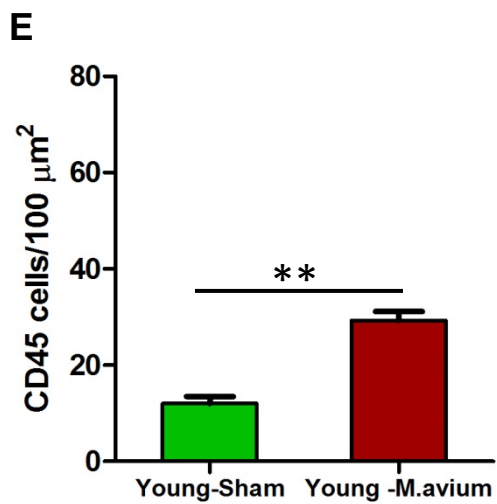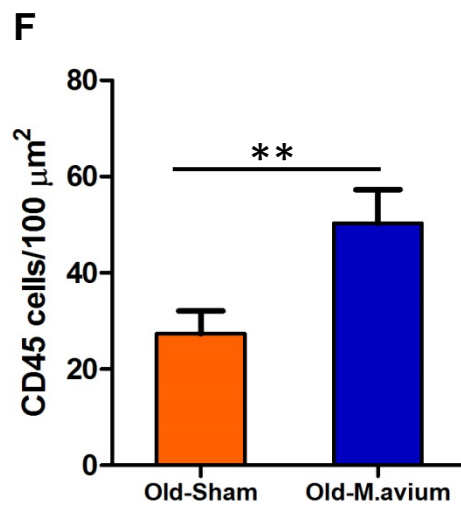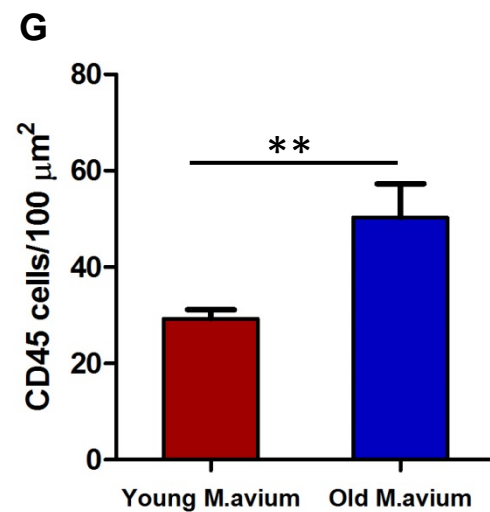

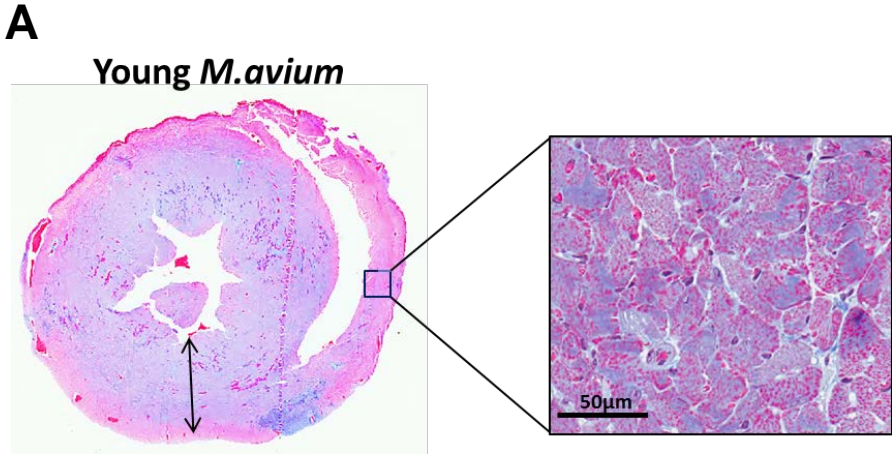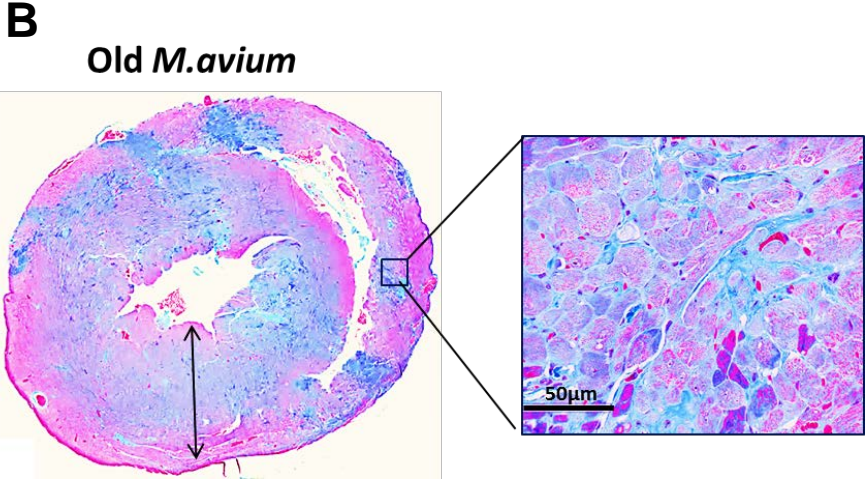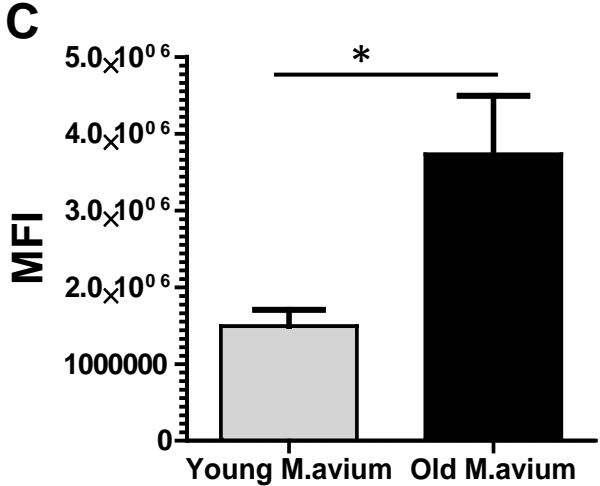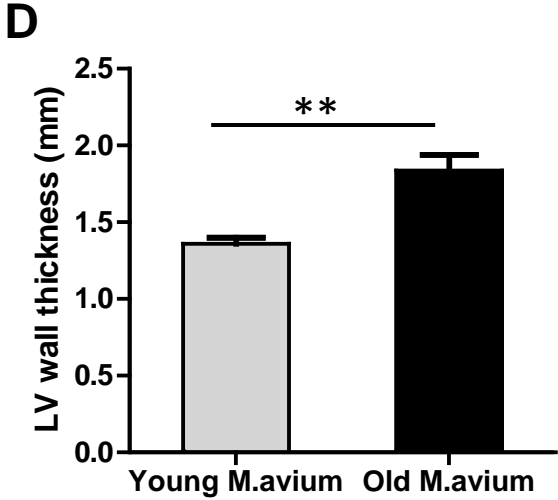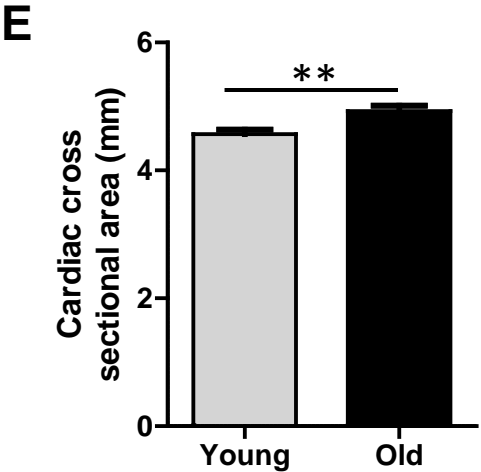

| Number | Gene   | Fold change <i>M. avium</i> Young vs Control Young | p. Value    |
|--------|--------|----------------------------------------------------|-------------|
| 1      | Gbp2b  | 8.156216099                                        | 0.002554875 |
| 2      | Ccl8   | 3.668016173                                        | 0.007050465 |
| 3      | Ccl5   | 3.426415242                                        | 0.000181647 |
| 4      | Zbp1   | 3.08656035                                         | 0.007761389 |
| 5      | Nlrc5  | 2.897884309                                        | 0.003292765 |
| 6      | H2-Aa  | 2.866916726                                        | 0.005708321 |
| 7      | C4b    | 2.66456495                                         | 0.001997975 |
| 8      | Klrk1  | 2.616611977                                        | 0.000122996 |
| 9      | Ccr2   | 2.326078846                                        | 0.000788008 |
| 10     | H2-K1  | 2.306811309                                        | 0.002043211 |
| 11     | Klra2  | 2.244198051                                        | 0.007732149 |
| 12     | Gzma   | 2.241710536                                        | 0.004469356 |
| 13     | Slamf7 | 2.239536221                                        | 0.000236464 |
| 14     | Cxcr6  | 2.11608855                                         | 0.005699367 |
| 15     | Cybb   | 2.014190307                                        | 0.000407557 |
| 16     | Ccl25  | 0.491444362                                        | 0.005350655 |
| 17     | Tfrc   | 0.3900957                                          | 3.34E-05    |
| 18     | Zap70  | 0.389879445                                        | 0.00093628  |
| 19     | Cd19   | 0.311585499                                        | 0.004053236 |
| 20     | Fos    | 0.277854209                                        | 0.000260981 |
| 21     | Cd22   | 0.169317148                                        | 0.000502142 |
| 22     | Dmbt1  | 0.047907655                                        | 3.41E-07    |

**Supplementary Table1. Immune profiling gene panel in heart tissue from young mice exposed to *M.avium*.** Total RNA purified from sham or *M.avium* infected young mice hearts were used for NanoString analysis by using nCounter Mouse PanCancer Immune Profiling Panel. Total RNA (200ng) purified from the heart tissue and used for NanoString analysis. The relative expression of each transcript was normalized against the expression of the top Genes with counts > 100. Each value is the mean of biological triplicate and the ratios between means per target genes provides linear Fold change. Two-tailed Student's t test is used to select differentially expressed genes with values < 0.05.



| Number | Gene     | Fold change <i>M. avium</i> Old vs Control Old | p. Value    |
|--------|----------|------------------------------------------------|-------------|
| 1      | Il1rn    | 133.8524745                                    | 1.77E-09    |
| 2      | Spp1     | 78.29780725                                    | 2.18E-12    |
| 3      | Ccl5     | 57.5203281                                     | 4.36E-10    |
| 4      | Cxcl10   | 41.27796664                                    | 3.94E-07    |
| 5      | Ccl3     | 25.91292557                                    | 5.89E-11    |
| 6      | Ccl2     | 25.3462428                                     | 4.58E-11    |
| 7      | Ccl7     | 24.77477414                                    | 2.21E-09    |
| 8      | Fcgr1    | 21.01576401                                    | 4.41E-09    |
| 9      | Ccl4     | 17.57923031                                    | 1.98E-08    |
| 10     | Cxcl11   | 17.54879421                                    | 6.16E-08    |
| 11     | Cd180    | 17.12105858                                    | 3.51E-10    |
| 12     | Marco    | 16.97335671                                    | 3.76E-05    |
| 13     | Fpr2     | 15.99667324                                    | 8.11E-08    |
| 14     | Slamf7   | 14.28669198                                    | 6.08E-10    |
| 15     | Ccl12    | 14.12716428                                    | 1.85E-08    |
| 16     | C3ar1    | 12.4226409                                     | 6.73E-12    |
| 17     | Msr1     | 12.00280757                                    | 3.85E-10    |
| 18     | Cmpk2    | 11.32469272                                    | 2.62E-09    |
| 19     | Ifit2    | 10.92226379                                    | 1.42E-07    |
| 20     | Cxcl15   | 10.73164997                                    | 2.08E-03    |
| 21     | Cd69     | 10.15205581                                    | 1.90E-09    |
| 22     | Fcgr4    | 10.12114075                                    | 2.59E-05    |
| 23     | Lgals3   | 9.251581459                                    | 1.15E-08    |
| 24     | Rsad2    | 9.121682785                                    | 4.97E-08    |
| 25     | Tlr1     | 8.886405653                                    | 7.70E-09    |
| 26     | Oasl1    | 8.838490519                                    | 9.23834E-07 |
| 27     | Emr1     | 8.600973737                                    | 2.55E-10    |
| 28     | Cd68     | 8.084171905                                    | 2.79E-11    |
| 29     | Ccr3     | 7.863109799                                    | 1.55E-04    |
| 30     | Ctss     | 7.719460374                                    | 2.88655E-08 |
| 31     | Isg15    | 7.563216934                                    | 4.26E-06    |
| 32     | Ly9      | 6.903366122                                    | 2.72E-08    |
| 33     | Tnfrsf1b | 6.582337498                                    | 8.89E-10    |
| 34     | Fcer1g   | 6.51109415                                     | 6.60E-10    |
| 35     | Il7r     | 6.510642851                                    | 2.20E-07    |
| 36     | Irf7     | 6.179970708                                    | 4.31E-05    |
| 37     | Il1a     | 6.036448499                                    | 6.75E-06    |
| 38     | Ikbke    | 5.778920408                                    | 3.12E-08    |
| 39     | Hck      | 5.627912896                                    | 1.88E-07    |
| 40     | Itgam    | 5.590587887                                    | 5.81E-07    |

|    |           |             |             |
|----|-----------|-------------|-------------|
| 41 | Ifi44     | 5.444879043 | 9.81E-06    |
| 42 | Ifit3     | 5.387440385 | 8.12E-05    |
| 43 | Mefv      | 5.332825052 | 4.93E-06    |
| 44 | Ebi3      | 5.272546816 | 1.63E-08    |
| 45 | Oas3      | 5.197435682 | 4.02E-05    |
| 46 | Tnf       | 5.183763862 | 6.28E-07    |
| 47 | Trem2     | 5.071455999 | 2.78E-06    |
| 48 | Tlr8      | 4.836287466 | 4.56E-08    |
| 49 | Ifnb1     | 4.564636572 | 0.00127552  |
| 50 | Usp18     | 4.460483186 | 1.12534E-05 |
| 51 | Cfb       | 4.417101548 | 7.91E-04    |
| 52 | Cd84      | 4.410065245 | 1.36397E-07 |
| 53 | Il23r     | 4.373838648 | 6.35E-05    |
| 54 | Zbp1      | 4.313921727 | 1.34E-03    |
| 55 | Slc11a1   | 4.294231594 | 6.30679E-07 |
| 56 | Ccr1      | 4.223092947 | 3.65E-06    |
| 57 | Cybb      | 4.150542738 | 3.57E-07    |
| 58 | Cd200r1   | 4.13331696  | 1.18821E-07 |
| 59 | Mx2       | 4.027263864 | 7.75E-05    |
| 60 | Pou2f2    | 4.010549725 | 3.41E-04    |
| 61 | Ifit1     | 3.940011935 | 0.000435588 |
| 62 | Il18      | 3.928830697 | 8.04E-07    |
| 63 | Casp1     | 3.863209724 | 5.52E-08    |
| 64 | Csf3r     | 3.860532879 | 5.33E-06    |
| 65 | Itgb2     | 3.796842093 | 6.25E-07    |
| 66 | Il21r     | 3.770876757 | 5.78603E-05 |
| 67 | Herc6     | 3.700191659 | 8.35E-06    |
| 68 | Thbs1     | 3.65431247  | 1.74E-07    |
| 69 | Tgfb2     | 3.458868102 | 3.42E-07    |
| 70 | Tlr9      | 3.38792045  | 2.29E-06    |
| 71 | Ccl9      | 3.38674649  | 1.78E-06    |
| 72 | Cd274     | 3.379008548 | 2.13E-03    |
| 73 | Raet1     | 3.238217747 | 2.93E-04    |
| 74 | Siglec1   | 3.143779429 | 2.87E-05    |
| 75 | Blnk      | 3.10609079  | 9.90E-06    |
| 76 | Clec4a2   | 3.096202863 | 1.27E-06    |
| 77 | Ncf4      | 3.067365319 | 1.18562E-05 |
| 78 | Csf2rb    | 3.06014497  | 8.41E-05    |
| 79 | Tnfrsf11a | 3.059932864 | 9.62E-07    |
| 80 | Cfp       | 3.051672197 | 5.85E-05    |
| 81 | Tlr7      | 3.032273741 | 1.16647E-06 |

|     |          |             |             |
|-----|----------|-------------|-------------|
| 82  | Bst2     | 2.989284066 | 1.09E-04    |
| 83  | Il2rg    | 2.95099198  | 1.74122E-05 |
| 84  | Abcg1    | 2.90613153  | 7.51E-07    |
| 85  | Irf5     | 2.855216216 | 7.9006E-06  |
| 86  | Lyz2     | 2.826075483 | 5.94E-06    |
| 87  | Cd14     | 2.793550692 | 7.17E-06    |
| 88  | Isg20    | 2.760634707 | 1.72E-04    |
| 89  | Fcgr2b   | 2.717160902 | 5.48E-07    |
| 90  | Ddx58    | 2.689429181 | 1.06092E-06 |
| 91  | Cd48     | 2.687938258 | 8.70E-07    |
| 92  | Il4ra    | 2.626424294 | 4.89E-06    |
| 93  | Lcn2     | 2.623876833 | 3.12011E-06 |
| 94  | Itgal    | 2.616430614 | 8.45E-05    |
| 95  | Alcam    | 2.571125443 | 3.98E-06    |
| 96  | Ccr5     | 2.520307909 | 1.29E-05    |
| 97  | Pik3cd   | 2.461947505 | 7.25848E-06 |
| 98  | Bst1     | 2.454110143 | 0.000511975 |
| 99  | Il1b     | 2.449351795 | 0.000684114 |
| 100 | Socs1    | 2.446976082 | 8.62E-04    |
| 101 | Maf      | 2.390313755 | 6.46E-06    |
| 102 | Stat2    | 2.380888403 | 0.001587534 |
| 103 | Ptpnc    | 2.241710536 | 0.000169124 |
| 104 | Cxcl16   | 2.192535193 | 9.72E-06    |
| 105 | Btk      | 2.154420705 | 8.96E-05    |
| 106 | Nlrp3    | 2.112132    | 5.60E-03    |
| 107 | Ccl6     | 0.499896039 | 0.002288981 |
| 108 | Cxcr6    | 0.499341944 | 9.05E-03    |
| 109 | Map2k4   | 0.498201061 | 0.000201815 |
| 110 | Kdr      | 0.49768334  | 0.000745456 |
| 111 | Ceacam1  | 0.492569772 | 0.000640361 |
| 112 | Bcl10    | 0.49127407  | 0.000119972 |
| 113 | Il7      | 0.490491486 | 0.002347583 |
| 114 | Stat5b   | 0.488963947 | 0.000711871 |
| 115 | Il11ra1  | 0.488692883 | 0.001618514 |
| 116 | Cd83     | 0.488659011 | 0.001485925 |
| 117 | Lyve1    | 0.487948232 | 2.92692E-05 |
| 118 | Mapk8    | 0.487576332 | 0.000302186 |
| 119 | Tie1     | 0.487339815 | 0.000662717 |
| 120 | Sigirr   | 0.486698421 | 0.000597596 |
| 121 | Tnfsf13b | 0.486327474 | 0.006280554 |
| 122 | Map3k7   | 0.486125258 | 0.000492961 |

|     |          |             |             |
|-----|----------|-------------|-------------|
| 123 | Creb1    | 0.484913727 | 0.000318912 |
| 124 | Cd81     | 0.482633512 | 1.6973E-05  |
| 125 | Tnfsf12  | 0.481864693 | 8.8811E-05  |
| 126 | Masp1    | 0.481630947 | 0.00154431  |
| 127 | Cxcr2    | 0.479200062 | 0.001479693 |
| 128 | Reps1    | 0.478635729 | 0.000202035 |
| 129 | Fyn      | 0.475593202 | 0.000137154 |
| 130 | Cd163    | 0.474703963 | 1.58E-04    |
| 131 | Cfh      | 0.47440792  | 7.92669E-06 |
| 132 | Gzma     | 0.473455258 | 0.007234022 |
| 134 | C8g      | 0.470054518 | 0.003121692 |
| 135 | Serping1 | 0.469891638 | 1.38225E-05 |
| 136 | Mcam     | 0.46648416  | 8.37411E-06 |
| 137 | Slc7a11  | 0.466257876 | 0.003662304 |
| 138 | C1s1     | 0.46616093  | 2.45E-05    |
| 139 | Mef2c    | 0.46577335  | 0.000124904 |
| 140 | Cd9      | 0.464805808 | 3.62729E-05 |
| 141 | Hras     | 0.463005103 | 0.00214174  |
| 142 | Atg10    | 0.459615705 | 0.000231614 |
| 143 | Prkce    | 0.459329071 | 0.000260895 |
| 144 | Atg12    | 0.457898581 | 7.85E-05    |
| 145 | Syt17    | 0.456947397 | 0.00843347  |
| 146 | Cxcl1    | 0.45546118  | 4.66E-04    |
| 147 | Cxcl12   | 0.450437861 | 0.000147828 |
| 148 | Map2k2   | 0.449720327 | 0.000149174 |
| 149 | Il6st    | 0.448475165 | 2.27107E-05 |
| 150 | Cd36     | 0.448319762 | 0.000205412 |
| 151 | Fcer1a   | 0.447915967 | 0.005013687 |
| 152 | Egr1     | 0.446706762 | 4.08785E-05 |
| 153 | Psma2    | 0.445408193 | 1.25E-04    |
| 154 | Ikzf2    | 0.44260756  | 0.000661001 |
| 155 | Yy1      | 0.442392858 | 1.25064E-05 |
| 156 | Selp1g   | 0.442055679 | 0.000415535 |
| 157 | Itga1    | 0.44031259  | 5.16882E-05 |
| 158 | Ptgs2    | 0.432028981 | 0.000669833 |
| 159 | Cd3eap   | 0.431191308 | 1.25E-04    |
| 160 | Thbd     | 0.430862666 | 3.63498E-05 |
| 161 | Mme      | 0.430206134 | 0.001154899 |
| 162 | Angpt2   | 0.429342234 | 4.25984E-06 |
| 163 | Il1rl1   | 0.429282718 | 2.17E-03    |
| 164 | Lck      | 0.429015001 | 3.02E-03    |

|     |          |             |             |
|-----|----------|-------------|-------------|
| 165 | Dusp4    | 0.426790509 | 0.001651043 |
| 166 | Ada      | 0.426199262 | 0.000646086 |
| 167 | Smpd3    | 0.425343408 | 0.00067192  |
| 168 | Psmb7    | 0.422024892 | 6.03E-05    |
| 169 | Anp32b   | 0.420943935 | 4.53E-06    |
| 170 | Cxcl5    | 0.420564797 | 2.20E-03    |
| 171 | Mill2    | 0.420331651 | 4.3354E-06  |
| 172 | Tnfsf18  | 0.419865746 | 1.32E-03    |
| 173 | Irak1    | 0.417717647 | 5.65E-05    |
| 174 | Clu      | 0.416763258 | 5.94902E-05 |
| 175 | Il1r1    | 0.416243601 | 8.02E-06    |
| 176 | Atf1     | 0.415897524 | 7.92298E-05 |
| 177 | Hmgb1    | 0.412195311 | 2.53206E-05 |
| 178 | Vegfa    | 0.411938251 | 1.96E-04    |
| 179 | Twist1   | 0.408922684 | 7.63747E-05 |
| 180 | F13a1    | 0.408497739 | 1.28E-06    |
| 181 | Rrad     | 0.40762092  | 3.84E-04    |
| 182 | Cd34     | 0.403796413 | 7.43251E-07 |
| 183 | Adora2a  | 0.403097293 | 5.42E-05    |
| 184 | Mapkapk2 | 0.401368694 | 1.26038E-05 |
| 185 | Cx3cr1   | 0.400090978 | 0.000102758 |
| 186 | Cd3g     | 0.399536718 | 0.001647518 |
| 187 | Klra5    | 0.399398273 | 0.001949771 |
| 188 | Psmd7    | 0.395623492 | 1.13165E-05 |
| 189 | Il13ra1  | 0.395239763 | 2.20438E-05 |
| 190 | Thy1     | 0.394118124 | 1.59E-05    |
| 191 | Tmed1    | 0.393681275 | 6.43E-05    |
| 192 | Atf2     | 0.391612847 | 1.48227E-05 |
| 193 | Cxcl14   | 0.390745185 | 0.000687521 |
| 194 | Ifi27    | 0.390203872 | 1.52E-03    |
| 195 | Xbp1     | 0.3900957   | 1.2692E-05  |
| 196 | Hspb2    | 0.388799967 | 5.11E-05    |
| 197 | Ccl27a   | 0.387696603 | 1.07E-03    |
| 198 | S100a8   | 0.386569575 | 0.003747308 |
| 199 | Vegfc    | 0.385739823 | 3.05971E-05 |
| 200 | Tgfb3    | 0.38315499  | 4.00044E-05 |
| 201 | Tek      | 0.382147103 | 4.87536E-06 |
| 202 | Cma1     | 0.382014684 | 0.001570741 |
| 203 | Jam3     | 0.38151191  | 5.22789E-06 |
| 204 | Ets1     | 0.380271046 | 1.69607E-06 |
| 205 | Bcl2     | 0.380244688 | 0.000203203 |

|     |           |             |             |
|-----|-----------|-------------|-------------|
| 206 | Timd4     | 0.379560035 | 0.000857354 |
| 207 | Zfp13     | 0.379113044 | 8.08E-06    |
| 208 | Hsd11b1   | 0.376912096 | 5.70E-06    |
| 209 | Ccl21a    | 0.376103073 | 2.00936E-06 |
| 210 | Pou2af1   | 0.375087737 | 1.59E-03    |
| 211 | Dll4      | 0.371491215 | 9.16296E-05 |
| 212 | Pecam1    | 0.368925138 | 8.63E-07    |
| 213 | C1qbp     | 0.365869232 | 1.36E-05    |
| 214 | S100b     | 0.360632169 | 6.61E-04    |
| 215 | Lilra5    | 0.359284848 | 1.21E-04    |
| 216 | Icam2     | 0.359259945 | 1.10E-06    |
| 217 | Nt5e      | 0.356902027 | 6.19E-06    |
| 218 | Bmi1      | 0.354092944 | 3.5014E-05  |
| 219 | Ccl19     | 0.349896466 | 1.29E-04    |
| 220 | Cd200     | 0.343028417 | 5.34E-06    |
| 221 | Fez1      | 0.34231585  | 1.10479E-05 |
| 222 | Lag3      | 0.341320743 | 1.90015E-05 |
| 223 | Ccl24     | 0.329854113 | 0.000265932 |
| 224 | Gzmm      | 0.327939139 | 0.000248378 |
| 225 | Ecsit     | 0.320967694 | 3.88777E-06 |
| 226 | Hamp      | 0.30245659  | 0.000405649 |
| 227 | Rps6      | 0.296766469 | 1.70145E-05 |
| 228 | Cd3d      | 0.293452723 | 0.000120492 |
| 229 | Cd207     | 0.273573425 | 5.66246E-05 |
| 230 | Rorc      | 0.208121801 | 4.6044E-07  |
| 231 | Tnfrsf12a | 0.187582871 | 7.8487E-06  |
| 232 | Kit       | 0.174911858 | 0.008110328 |

**Supplementary Table 2. Immune profiling gene panel in heart tissue from old mice exposed to *M.avium*.** Total RNA purified from sham or *M.avium* infected old mice hearts were used for NanoString analysis by using nCounter Mouse PanCancer Immune Profiling Panel. Total RNA (200ng) purified from the heart tissue and used for NanoString analysis. The relative expression of each transcript was normalized against the expression of the top Genes with counts > 100. Each value is the mean of biological triplicate and the ratios between means per target genes provides linear Fold change. Two-tailed Student's t test is used to select differentially expressed genes with values < 0.05.

| Number | Gene   | Fold change <i>M. avium</i> Old vs <i>M. avium</i> Young | p Value  |
|--------|--------|----------------------------------------------------------|----------|
| 1      | Il1rn  | 204.2227814                                              | 6.58E-10 |
| 2      | Spp1   | 170.5321568                                              | 2.87E-13 |
| 3      | Ccl5   | 67.79937176                                              | 2.70E-10 |
| 4      | Ccl3   | 42.83446012                                              | 1.02E-11 |
| 5      | Ccl7   | 40.65892031                                              | 3.96E-10 |
| 6      | Fcgr1  | 39.25759805                                              | 4.76E-10 |
| 7      | Ccl4   | 34.84065883                                              | 1.59E-09 |
| 8      | Cxcl10 | 34.19231028                                              | 6.99E-07 |
| 9      | Ccl2   | 30.04806117                                              | 2.45E-11 |
| 10     | Ccl12  | 27.76316232                                              | 1.27E-09 |
| 11     | Cxcl11 | 25.88061508                                              | 1.41E-08 |
| 12     | C3ar1  | 17.33841362                                              | 1.46E-12 |
| 13     | Lgals3 | 16.35545511                                              | 7.73E-10 |
| 14     | Slamf7 | 14.93473776                                              | 4.98E-10 |
| 15     | Cmpk2  | 14.47007004                                              | 8.33E-10 |
| 16     | Fpr2   | 14.17915841                                              | 1.35E-07 |
| 17     | Msr1   | 14.00820309                                              | 1.86E-10 |
| 18     | Ifit2  | 13.92205235                                              | 4.70E-08 |
| 19     | Fcgr4  | 13.58930718                                              | 7.78E-06 |
| 20     | Cd180  | 13.55543965                                              | 9.84E-10 |
| 21     | Isg15  | 13.150083                                                | 3.10E-07 |
| 22     | Trem2  | 12.56466238                                              | 1.94E-08 |
| 23     | Oasl1  | 11.37504226                                              | 2.75E-07 |
| 24     | Cd68   | 11.20755753                                              | 4.71E-12 |
| 25     | Ctss   | 11.14712684                                              | 4.16E-09 |
| 26     | Ccl8   | 10.34527435                                              | 7.40E-05 |
| 27     | Emr1   | 10.26029282                                              | 9.82E-11 |
| 28     | Rsad2  | 9.387233203                                              | 4.28E-08 |
| 29     | Fcer1g | 9.304960332                                              | 8.03E-11 |
| 30     | Ccr3   | 9.270197015                                              | 7.70E-05 |
| 31     | Il1a   | 8.944494808                                              | 8.23E-07 |
| 32     | Il23r  | 8.335680608                                              | 1.61E-06 |
| 33     | Irf7   | 8.087534716                                              | 1.11E-05 |
| 34     | Ifit3  | 7.576859522                                              | 1.36E-05 |
| 35     | Ccl9   | 7.237041276                                              | 7.46E-09 |
| 36     | Tlr1   | 7.172121855                                              | 2.57E-08 |
| 37     | Oas3   | 7.111234345                                              | 7.07E-06 |
| 38     | Tlr8   | 7.067500107                                              | 3.66E-09 |
| 39     | Ccr1   | 7.067010243                                              | 1.28E-07 |
| 40     | Hck    | 6.788063214                                              | 5.84E-08 |

|    |           |             |             |
|----|-----------|-------------|-------------|
| 41 | Mefv      | 6.490366738 | 1.52E-06    |
| 42 | Il7r      | 6.44821568  | 2.33E-07    |
| 43 | Cd69      | 6.42189911  | 2.53E-08    |
| 44 | Cd84      | 6.088555535 | 1.42E-08    |
| 45 | Cd200r1   | 6.07253963  | 7.40E-09    |
| 46 | Tnfrsf1b  | 6.07253963  | 1.50E-09    |
| 47 | Ifi44     | 5.919190958 | 5.98E-06    |
| 48 | Ly9       | 5.908942663 | 7.16E-08    |
| 49 | Ifit1     | 5.765716894 | 4.87E-05    |
| 50 | Zbp1      | 5.465676224 | 0.000406421 |
| 51 | Ebi3      | 5.441860598 | 1.31E-08    |
| 52 | Il1b      | 5.412143155 | 1.63E-06    |
| 53 | Casp1     | 5.262688486 | 5.01E-09    |
| 54 | Usp18     | 5.189875751 | 4.16E-06    |
| 55 | Cfb       | 4.968464304 | 0.0004263   |
| 56 | Herc6     | 4.914347922 | 1.05E-06    |
| 57 | Ikbke     | 4.640241848 | 1.44E-07    |
| 58 | Bst2      | 4.545692203 | 4.51E-06    |
| 59 | Slc11a1   | 4.457083534 | 4.77E-07    |
| 60 | Itgam     | 4.423229198 | 2.83E-06    |
| 61 | Clec4n    | 4.244810061 | 5.06E-07    |
| 62 | Clec4a2   | 4.22836524  | 8.46E-08    |
| 63 | Marco     | 4.142782272 | 0.008504904 |
| 64 | Tnf       | 4.095955382 | 3.33E-06    |
| 65 | Lyz2      | 4.061464403 | 2.32E-07    |
| 66 | Ifnb1     | 4.051342344 | 0.002321705 |
| 67 | Cybb      | 4.011661839 | 4.67E-07    |
| 68 | Lcn2      | 3.98560849  | 5.81E-08    |
| 69 | Mx2       | 3.968241973 | 8.56E-05    |
| 70 | Tlr7      | 3.943563846 | 1.10E-07    |
| 71 | Il21r     | 3.922844096 | 4.38E-05    |
| 72 | Fcgr2b    | 3.891428905 | 1.67E-08    |
| 73 | Ncf4      | 3.756268002 | 2.10E-06    |
| 74 | Tnfrsf11a | 3.753144925 | 1.49E-07    |
| 75 | Ccr5      | 3.68279221  | 3.31E-07    |
| 76 | Cd14      | 3.580844822 | 7.14E-07    |
| 77 | Raet1     | 3.566477816 | 0.000146583 |
| 78 | Il18      | 3.53497497  | 1.92E-06    |
| 79 | Cfp       | 3.520792003 | 1.81E-05    |
| 80 | C1qb      | 3.480995623 | 5.01E-08    |
| 81 | Fcgr3     | 3.43212001  | 2.58E-06    |



|     |         |             |             |
|-----|---------|-------------|-------------|
| 82  | Cxcl16  | 3.386042309 | 8.08E-08    |
| 83  | Cd274   | 3.355668031 | 0.002218232 |
| 84  | Tgfb2   | 3.273196014 | 5.66E-07    |
| 85  | C5ar1   | 3.053364873 | 1.17E-06    |
| 86  | Siglec1 | 3.025974857 | 3.98E-05    |
| 87  | Csf3r   | 2.958775018 | 4.77E-05    |
| 88  | Cd48    | 2.95733976  | 3.14E-07    |
| 89  | Il4ra   | 2.921278694 | 1.62E-06    |
| 90  | Bst1    | 2.881260294 | 0.000123616 |
| 91  | Itgb2   | 2.843366363 | 8.42E-06    |
| 92  | Tlr9    | 2.82666321  | 1.22E-05    |
| 93  | Pou2f2  | 2.81551727  | 0.003235867 |
| 94  | Irf5    | 2.756046062 | 1.12E-05    |
| 95  | Csf2rb  | 2.728484787 | 0.000222699 |
| 96  | Abcg1   | 2.726972214 | 1.47E-06    |
| 97  | Socs1   | 2.649095768 | 0.000433652 |
| 98  | Socs3   | 2.602142554 | 0.000212948 |
| 99  | Nlrp3   | 2.590983809 | 0.001027969 |
| 100 | Blnk    | 2.583451858 | 5.67E-05    |
| 101 | Maf     | 2.360512299 | 7.51E-06    |
| 102 | Isg20   | 2.351367437 | 0.000731659 |
| 103 | Fos     | 2.346157718 | 0.005511573 |
| 104 | Ddx58   | 2.326401331 | 5.72E-06    |
| 105 | Alcam   | 2.323983781 | 1.28E-05    |
| 106 | Thbs1   | 2.316264488 | 1.79E-05    |
| 107 | Batf    | 2.256364275 | 0.00020071  |
| 108 | Il2rg   | 2.234884075 | 0.000276662 |
| 109 | Oas2    | 2.185403992 | 6.23E-05    |
| 110 | Ly86    | 2.184041091 | 0.000353233 |
| 111 | Tlr6    | 2.180864294 | 5.78E-05    |
| 112 | Stat2   | 2.113450027 | 0.004435959 |
| 113 | Ticam2  | 2.101180353 | 1.60E-05    |
| 114 | Tlr2    | 2.076134629 | 0.000569834 |
| 115 | Anxa1   | 2.059936692 | 0.000124898 |
| 116 | Ptprc   | 2.04854559  | 0.000467039 |
| 117 | Ddx60   | 2.015167835 | 0.003814171 |
| 118 | Bid     | 2.006526208 | 0.000709943 |
| 119 | Vwf     | 0.498926775 | 0.000320748 |
| 120 | Stat5b  | 0.497786842 | 0.000869716 |
| 121 | Map2k4  | 0.497338492 | 0.000197455 |
| 122 | Cyfip2  | 0.497028333 | 0.001850584 |

|     |           |             |             |
|-----|-----------|-------------|-------------|
| 123 | Slamf1    | 0.496511831 | 0.008744683 |
| 124 | Mapk1     | 0.495823996 | 0.000138179 |
| 125 | Crebbp    | 0.49520576  | 0.001056651 |
| 126 | Il1rl1    | 0.494794031 | 0.007283819 |
| 127 | Pparg     | 0.493321476 | 0.001245811 |
| 128 | Cd2       | 0.493047997 | 0.007821766 |
| 129 | Reps1     | 0.492126121 | 0.000282161 |
| 130 | Rps6      | 0.490899635 | 0.001804881 |
| 131 | St6gal1   | 0.490729532 | 0.000374184 |
| 132 | Cd36      | 0.489336906 | 0.000546828 |
| 133 | Ceacam1   | 0.488963947 | 0.000589089 |
| 134 | Gpi1      | 0.488151206 | 0.000236532 |
| 135 | Tfrc      | 0.487576332 | 0.000387542 |
| 136 | Il11ra1   | 0.486529774 | 0.001546294 |
| 137 | Atf2      | 0.485552769 | 0.000175005 |
| 138 | Il16      | 0.48494734  | 0.001345785 |
| 139 | Egfr      | 0.482533162 | 0.000532461 |
| 140 | Tnfrsf10b | 0.482065136 | 0.000478417 |
| 141 | Csf1      | 0.480131002 | 0.000318102 |
| 142 | Myc       | 0.480064447 | 0.00049002  |
| 143 | Hmgb1     | 0.479964631 | 0.000148873 |
| 144 | Nfatc1    | 0.478735269 | 0.001712739 |
| 145 | Mapkapk2  | 0.4765832   | 9.45E-05    |
| 146 | Smad3     | 0.47355372  | 0.000573484 |
| 147 | ErbB2     | 0.473258394 | 0.001396521 |
| 148 | Cx3cr1    | 0.472537261 | 0.000582292 |
| 149 | Mef2c     | 0.47243901  | 0.000147918 |
| 150 | Cmah      | 0.471621044 | 0.001513633 |
| 151 | Fadd      | 0.471065637 | 0.000779832 |
| 152 | Cd34      | 0.4695335   | 5.20E-06    |
| 153 | Prkce     | 0.468623108 | 0.000326222 |
| 154 | Klrd1     | 0.465999399 | 0.007133788 |
| 155 | Cspg4     | 0.46554741  | 9.21E-05    |
| 156 | Ccnd3     | 0.461755164 | 0.000190975 |
| 157 | Pla2g6    | 0.460636297 | 0.000477276 |
| 158 | Icam2     | 0.459998161 | 1.96E-05    |
| 159 | Dock9     | 0.458025555 | 0.000325815 |
| 160 | Eng       | 0.457391037 | 5.48E-05    |
| 161 | Smad4     | 0.456630775 | 0.000130502 |
| 162 | Itga1     | 0.456282744 | 7.85E-05    |
| 163 | Tmed1     | 0.4557454   | 0.000298273 |

|     |        |             |             |
|-----|--------|-------------|-------------|
| 164 | Col1a1 | 0.455114041 | 2.88E-05    |
| 165 | Sigirr | 0.455082495 | 0.000283923 |
| 166 | Igf1r  | 0.453602344 | 0.000899744 |
| 167 | Il6st  | 0.453350883 | 2.60E-05    |
| 168 | Cd81   | 0.452816992 | 7.25E-06    |
| 169 | Hspb2  | 0.452754222 | 0.000252756 |
| 170 | Nrp1   | 0.451187811 | 2.71E-05    |
| 171 | Egr1   | 0.449782676 | 4.44E-05    |
| 172 | Clu    | 0.449252987 | 0.000136026 |
| 173 | Ccl19  | 0.448475165 | 0.001223559 |
| 174 | Mcam   | 0.448350838 | 4.96E-06    |
| 175 | Bcl2   | 0.448195479 | 0.000952225 |
| 176 | Tab1   | 0.44813335  | 0.000297892 |
| 177 | Irak1  | 0.44807123  | 0.000122792 |
| 178 | Map3k5 | 0.447605603 | 0.000241269 |
| 179 | Pecam1 | 0.444051835 | 7.66E-06    |
| 180 | Cd200  | 0.441167983 | 7.56E-05    |
| 181 | A2m    | 0.441015113 | 0.00038528  |
| 182 | Thbd   | 0.433198454 | 3.87E-05    |
| 183 | Gtf3c1 | 0.432658305 | 0.000264802 |
| 184 | Ccl24  | 0.430862666 | 0.002324262 |
| 185 | Vegfa  | 0.426642621 | 0.000277798 |
| 186 | Cd276  | 0.426317446 | 0.000128221 |
| 187 | Timd4  | 0.425785876 | 0.002207442 |
| 188 | Cd163  | 0.421148228 | 3.97E-05    |
| 189 | C1qbp  | 0.420477352 | 5.83E-05    |
| 190 | Tgfb3  | 0.419342221 | 0.000101212 |
| 191 | Angpt1 | 0.417775559 | 5.86E-05    |
| 192 | Pdgfrb | 0.415897524 | 3.24E-05    |
| 193 | Rorc   | 0.411966805 | 0.000150025 |
| 194 | Ncr1   | 0.410883129 | 0.007900112 |
| 195 | Twist1 | 0.408356189 | 7.53E-05    |
| 196 | Tek    | 0.408327885 | 1.02E-05    |
| 197 | Cd1d1  | 0.408271283 | 0.007600486 |
| 198 | Cxcl12 | 0.407366712 | 4.93E-05    |
| 199 | Gzmm   | 0.404693056 | 0.001350022 |
| 200 | Fyn    | 0.404272507 | 2.11E-05    |
| 201 | Ccr7   | 0.403292925 | 0.000317519 |
| 202 | Tie1   | 0.40114619  | 8.30E-05    |
| 203 | Selplg | 0.399702915 | 0.000151903 |
| 204 | Dpp4   | 0.399647508 | 0.001623082 |

|     |           |             |             |
|-----|-----------|-------------|-------------|
| 205 | Cdh5      | 0.399066201 | 0.00019274  |
| 206 | Jam3      | 0.397850964 | 8.28E-06    |
| 207 | Nt5e      | 0.395842933 | 1.82E-05    |
| 208 | Kdr       | 0.389231399 | 5.32E-05    |
| 209 | Ecsit     | 0.388988659 | 2.56E-05    |
| 210 | Masp1     | 0.387535398 | 0.000185398 |
| 211 | Thy1      | 0.384218795 | 1.21E-05    |
| 212 | Dll4      | 0.383394089 | 0.000123173 |
| 213 | Ets1      | 0.381988206 | 1.78E-06    |
| 214 | Vegfc     | 0.377513463 | 2.46E-05    |
| 215 | Ccl21a    | 0.368618402 | 1.62E-06    |
| 216 | Tnfrsf12a | 0.367725212 | 0.000867541 |
| 217 | Fn1       | 0.358091456 | 0.000266675 |
| 218 | Zfp13     | 0.356284098 | 4.24E-06    |
| 219 | Cd207     | 0.352305768 | 0.000393699 |
| 220 | Cma1      | 0.346853897 | 0.000754336 |
| 221 | Cd3d      | 0.340540903 | 0.000373767 |
| 222 | C2        | 0.32894083  | 0.000224547 |
| 223 | Rrad      | 0.325651325 | 5.19E-05    |
| 224 | Lck       | 0.322976253 | 0.000326122 |
| 225 | Smpd3     | 0.30120132  | 3.28E-05    |
| 226 | Txnip     | 0.30038819  | 1.21E-05    |
| 227 | Col4a1    | 0.296704765 | 3.05E-06    |
| 228 | Msln      | 0.254952431 | 2.48E-05    |
| 229 | Col3a1    | 0.244736299 | 4.63E-08    |
| 230 | Gzma      | 0.239915787 | 4.37E-05    |

**Supplementary Table 3. Immune profiling gene panel in heart tissue from old and young mice exposed to *M.avium*.** Total RNA purified from sham or *M.avium* infected old and young mice hearts were used for NanoString analysis by using nCounter Mouse PanCancer Immune Profiling Panel. Total RNA (200ng) purified from the heart tissue and used for NanoString analysis. The relative expression of each transcript was normalized against the expression of the top Genes with counts > 100. Each value is the mean of biological triplicate and the ratios between means per target genes provides linear Fold change. Two-tailed Student's t test is used to select differentially expressed genes with values < 0.05.

| Number | Gene    | Fold change Control Old vs Control Young | p.Value     |
|--------|---------|------------------------------------------|-------------|
| 1      | Ccl8    | 19.90280685                              | 6.50E-06    |
| 2      | Cxcl13  | 5.21837275                               | 0.005280115 |
| 3      | C6      | 4.143069438                              | 0.001580204 |
| 4      | Ccl5    | 4.038445304                              | 5.77E-05    |
| 5      | Zbp1    | 3.910627171                              | 0.002226075 |
| 6      | Fcgr4   | 3.820337246                              | 0.002652368 |
| 7      | Clec4n  | 3.620527728                              | 1.80E-06    |
| 8      | Clec7a  | 3.581589515                              | 7.95E-06    |
| 9      | Xcl1    | 3.444990489                              | 0.002789936 |
| 10     | Ccl12   | 3.385807615                              | 7.36E-05    |
| 11     | Ccl6    | 3.140294799                              | 3.29E-05    |
| 12     | C4b     | 2.986384653                              | 0.000872979 |
| 13     | H2-Aa   | 2.877069356                              | 0.005589176 |
| 14     | Ccr2    | 2.868506923                              | 0.000119392 |
| 15     | Cfb     | 2.866519315                              | 0.008525782 |
| 16     | Ifit1   | 2.819227691                              | 0.003577843 |
| 17     | Il1rn   | 2.800142018                              | 0.006949722 |
| 18     | Cxcr6   | 2.681796933                              | 0.000811967 |
| 19     | Psmb8   | 2.672889136                              | 0.001889241 |
| 20     | Trem2   | 2.553896395                              | 0.000515278 |
| 21     | Irf7    | 2.479759144                              | 0.009601642 |
| 22     | Casp1   | 2.456322517                              | 4.93E-06    |
| 23     | Psmb9   | 2.456322517                              | 0.003804134 |
| 24     | Ifit3   | 2.442739468                              | 0.009916946 |
| 25     | Fcgr3   | 2.424689481                              | 7.13E-05    |
| 26     | Ccl9    | 2.422841453                              | 4.67E-05    |
| 27     | Klra2   | 2.419485008                              | 0.004431991 |
| 28     | S100a8  | 2.416635687                              | 0.006051627 |
| 29     | Fcgr1   | 2.377260496                              | 0.001518648 |
| 30     | Ccr5    | 2.374460901                              | 2.51E-05    |
| 31     | Lgals3  | 2.364442405                              | 0.000246007 |
| 32     | Slamf7  | 2.341284089                              | 0.000147252 |
| 33     | Spp1    | 2.325756405                              | 0.000209404 |
| 34     | H2-DMb1 | 2.321086036                              | 0.004914469 |
| 35     | Msr1    | 2.276156886                              | 7.62E-05    |
| 36     | Ctss    | 2.271271231                              | 0.0003514   |
| 37     | Ly86    | 2.252145444                              | 0.00025404  |
| 38     | Isg15   | 2.24575415                               | 0.009084413 |
| 39     | Clec5a  | 2.210235352                              | 0.000114217 |

|    |         |             |             |
|----|---------|-------------|-------------|
| 40 | Il23r   | 2.182830338 | 0.008629666 |
| 41 | Il7     | 2.173319077 | 0.001251389 |
| 42 | C1qb    | 2.167752427 | 9.26E-06    |
| 43 | Cxcl11  | 2.157110378 | 0.009876862 |
| 44 | Cd207   | 2.129773487 | 0.004366008 |
| 45 | C1qa    | 2.10657605  | 1.09E-05    |
| 46 | Lyz2    | 2.044290185 | 0.000215092 |
| 47 | Herc6   | 2.033690306 | 0.001888239 |
| 48 | Cd200r1 | 2.02791896  | 0.000156901 |
| 49 | Cxcl16  | 2.008195884 | 3.17E-05    |
| 50 | Klrk1   | 2           | 0.00180635  |
| 51 | Ppbp    | 0.488794515 | 0.003430422 |
| 52 | Masp1   | 0.481964904 | 0.001555206 |
| 53 | Igf2r   | 0.476153948 | 0.000482866 |
| 54 | Cspg4   | 0.44664484  | 5.63E-05    |
| 55 | Crebbp  | 0.439306576 | 0.000293648 |
| 56 | Itgb3   | 0.424136339 | 0.000898726 |
| 57 | Igf1r   | 0.422962012 | 0.000454616 |
| 58 | Nfatc2  | 0.40779048  | 0.000223952 |
| 59 | Itga2b  | 0.393353957 | 0.000431738 |
| 60 | Col4a1  | 0.380297405 | 3.12E-05    |
| 61 | Gtf3c1  | 0.373479251 | 6.15E-05    |
| 62 | Fn1     | 0.366859614 | 0.000327032 |
| 63 | Sell    | 0.361608376 | 0.006282286 |
| 64 | Col3a1  | 0.361007321 | 1.71E-06    |
| 65 | Card11  | 0.338094863 | 0.001160324 |
| 66 | Ncam1   | 0.326600748 | 1.12E-05    |
| 67 | Col1a1  | 0.321034444 | 6.25E-07    |
| 68 | Tfrc    | 0.299805759 | 2.71E-06    |
| 69 | Pax5    | 0.241534303 | 0.003177184 |
| 70 | Cd22    | 0.224393066 | 0.001909524 |
| 71 | Cd19    | 0.132393115 | 4.57E-05    |
| 72 | Dmbt1   | 0.064654742 | 1.07E-06    |

**Supplementary Table 4. Immune profiling gene panel in heart tissue from old and young mice.** Total RNA purified from hearts of old and young mice were used for NanoString analysis by using nCounter Mouse PanCancer Immune Profiling Panel. Total RNA (200ng) purified from the heart tissue and used for NanoString analysis. The relative expression of each transcript was normalized against the expression of the top Genes with counts > 100. Each value is the mean of biological triplicate and the ratios between means per target genes provides linear Fold

change. Two-tailed Student's t test is used to select differentially expressed genes with values  $< 0.05$ .
